# Supplementary material
Source: publisher figshare collection journal article supplement (https://acs.figshare.com/ndownloader/files/24028196)
Supplement: Supplementary file 1 [file 24028196]

## Supporting information:

### Towards catalytic ketonization of volatile fatty acids extracted from fermented wastewater by adsorption

Egor V. Fufachev,<sup>1</sup> Bert M. Weckhuysen,<sup>1</sup> Pieter C.A. Bruijninx<sup>\*1,2</sup>

<sup>1</sup> Inorganic Chemistry and Catalysis, Debye Institute for Nanomaterials Science, Utrecht University, Universiteitsweg 99, 3584 CG Utrecht, The Netherlands

<sup>2</sup> Organic Chemistry and Catalysis, Debye Institute for Nanomaterials Science, Utrecht University, Universiteitsweg 99, 3584 CG Utrecht, The Netherlands

Corresponding author email: p.c.a.bruijninx@uu.nl

Supporting information consist of 4 pages containing 4 tables and 2 figures.

**Table S1.** Typical composition of fermented wastewater.<sup>1,2</sup>

| Component                                                                   | Concentration, g/L |
|-----------------------------------------------------------------------------|--------------------|
| Acetic acid                                                                 | 2.5 – 10           |
| Propionic acid                                                              | 2.5 – 10           |
| Butyric acid                                                                | 2.5 – 10           |
| Lactic acid                                                                 | 2.5 – 10           |
| Na <sup>+</sup>                                                             | 1 – 5              |
| K <sup>+</sup>                                                              | 1 – 5              |
| Cl <sup>-</sup>                                                             | 1 – 10             |
| H <sub>2</sub> PO <sub>4</sub> <sup>-</sup> /HPO <sub>4</sub> <sup>2-</sup> | 1 – 10             |
| SO <sub>4</sub> <sup>2-</sup>                                               | 1 – 10             |
| S <sup>2-</sup>                                                             | 0.3                |
| Mg <sup>2+</sup>                                                            | 0.3                |
| Ca <sup>2+</sup>                                                            | 0.3                |
| NH <sub>4</sub> <sup>+</sup>                                                | 0.1                |
| Trace elements (e.g. Co, Ni, Fe ions)                                       | 10-4               |
| Inert COD <sup>1</sup> (e.g. humic acid and fulvic acid)                    | 1                  |

<sup>1</sup> – chemical oxygen demand

#### Experimental section

##### Catalyst Preparation

The TiO<sub>2</sub> catalyst was prepared via a sol-gel method with controlled hydrolysis of titanium isopropoxide as reported by Tong et al.<sup>3</sup> In a typical synthesis 8 mL of titanium (IV) isopropoxide (Acros, >98%) was dissolved in 24 mL of ethanol (Acros, 99.5%, extra dry). 16 mL of acetic acid (Acros Organics, 99.8%) was added to the mixture dropwise under vigorous magnetic stirring (1200 rpm), followed by addition of 1 mL of H<sub>2</sub>SO<sub>4</sub> (95% in water). The solution was kept for 1 h at 40 °C followed by 3 h at 60 °C under continuous mixing. The resulting mixture was transferred to 45 mL autoclave and kept at 120 °C for 13 h under autogenous pressure. The precipitate was separated by a centrifuge and washed thoroughly with distilled water and ethanol. Finally, the catalyst was dried for 12 h at 100 °C followed by calcination at 460 °C in air for 2 h.

The TiO<sub>2</sub>/C catalyst was synthesized by modification of a method reported by Pham et al.<sup>4</sup> The procedure was as follows: activated carbon (SX-2, Norit) was dried at 100 °C for 2 h under vacuum. Titanium (IV) isopropoxide (Acros, >98%) was added dropwise to the dried carbon support to obtain a 30 wt.% loading of TiO<sub>2</sub>. The solid was

kept for 2 days at ambient conditions to slowly hydrolyse. Finally, it was dried under vacuum at 100 °C overnight, followed by thermal treatment at 400 °C (5 °C/min) under a nitrogen flow of 50 mL/min.

### Catalyst Characterization

Powder X-ray diffraction (XRD) patterns were measured with a Bruker-AXS D2 Phaser X-ray diffractometer using Co-K $\alpha_{1,2}$  radiation ( $\lambda = 1.790 \text{ \AA}$ ). XRD patterns were collected between 20 and 90° 2 $\theta$  with an increment of 0.03° (in 2Theta) and an acquisition time of 1 s per step. N<sub>2</sub> physisorption isotherms were recorded to determine surface areas, and pore volumes with a Micromeritics Tristar 3000 setup operating at 77 K. The samples were outgassed prior to performing the measurements for 20 h at 573 K under N<sub>2</sub> flow. Surface areas were determined using the Brunauer–Emmett–Teller (BET) theory, while pore volumes (cm<sup>3</sup>/g) were determined by the BJH method. Transmission electron microscopy (TEM) images were recorded on the Fei Talos F200X (S) microscope.

### Catalyst Testing

The gas-phase ketonization of the VFA mixture was studied in a conventional fixed bed reactor, schematically depicted in **Figure S1a**. The acids mixture consisted of acetic (Acros Organics, 99.8%), propionic (Alfa Aesar, 99%) and butyric (Acros Organics, 99+%) acids with a molar ratio of 1:5.5:19.9, respectively and cyclooctane (Sigma-Aldrich, ≥99%) added as an internal standard. For reactions with water, 60 vol.% of MilliQ water (18.2 M $\Omega$ ·cm at 25 °C) was added to the acids mixture with 1,4-dioxane (Sigma Aldrich, ≥99%) used as an internal standard. The liquid feed was pumped by an HPLC pump (LC-20AT, Shimadzu) with a weight hourly space velocity of 3.6 h<sup>-1</sup>. Mass flow controllers (F-201CV, Bronkhorst) were used to control the flow of N<sub>2</sub> carrier gas (100 mL/min). The borosilicate reactor (i.d. 8 mm) was loaded with TiO<sub>2</sub> catalyst (sieved, to a particle size of 212-150  $\mu$ m) mixed with two volumes of silicon carbide. Prior to reaction the catalyst bed was kept at 400 °C for 1 h in N<sub>2</sub> flow (100 mL/min) followed by a reduction in H<sub>2</sub> (50 mL/min). The catalytic studies were performed at atmospheric pressure and temperatures of 375 and 400 °C. The presence of mass transfer limitations was studied by determination of the Weisz-Prater number. The reaction products were analyzed by on-line GC (Bruker, 430-GC) equipped with FID detector and PoraPLOT Q-HT analytical column. Acid conversion, ketone yield and selectivity were calculated using the following equations:

$$\text{Ketone yield} = \frac{2 \times \text{Ketone moles}}{\text{Initial Acid moles}} \times 100\%$$

$$\text{Acid conversion} = \frac{\text{Initial Acid moles} - \text{remaining Acid moles}}{\text{Initial Acid moles}} \times 100\%$$

$$\text{Ketone selectivity} = \frac{2 \times \text{Ketone moles}}{\text{Initial Acid moles} - \text{remaining Acid moles}} \times 100\%$$

The statistical probabilities for the formation of a specific ketone product were calculated based on the mole fractions of corresponding acids,  $x$ , where  $0 < x < 1$ . Then the formation probability for homo-ketone formation is  $p_{\text{homo}} = x^2$ , while for cross-ketonization the probability is  $p_{\text{cross}} = (x_1 \cdot x_2) \cdot 2$ .

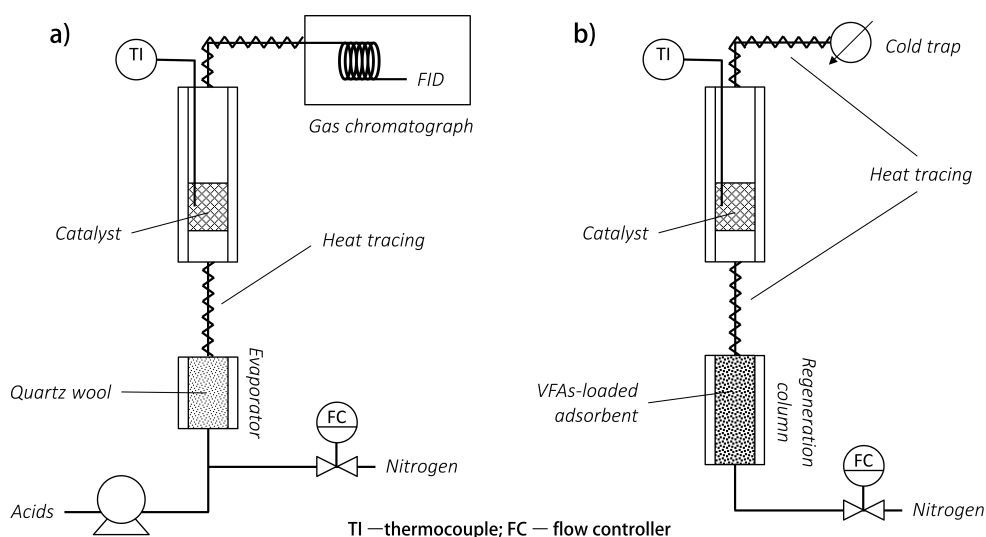

**Figure S1** Schematic view of (a) fixed-bed reactor for continuous gas-phase ketonization and (b) fixed-bed reactor for ketonization of VFA adsorbed on a resin batch.

For the ketonization reactions with VFA-saturated resins, the polystyrene-divinylbenzene-based (PS-DVB) adsorbent (Lewatit VP OC 1064 MD PH, Lenntech) was loaded with VFA according to the procedure reported by Reyhanitash et al.<sup>2</sup> This entailed that for saturation a borosilicate regeneration column (internal diameter of 2.5 cm and column height of 6 cm) was packed with the fresh polymeric adsorbent. Prior saturation, the adsorbent was dried at 120 °C for 3 h under N<sub>2</sub>-flow of 200 mL/min. The model solution (Table S3) was pumped through the column (2 mL/min) at room temperature for > 200 min to ensure complete saturation. The integrated recovery/catalytic conversion of VFA was performed in the setup illustrated in **Figure S1b**. The VFA-loaded adsorbent in a borosilicate regeneration column was connected to the gas-phase ketonization reactor. Prior to desorption, the adsorbent was dried under flowing N<sub>2</sub> (200 mL/min) at 70 °C for 1 h. The adsorbent was cooled down to room temperature. Subsequently, the catalyst was dried for 1 h in N<sub>2</sub> flow (100 mL/min) and reduced for 1 h in H<sub>2</sub> (50 mL/min) at 400 °C. The desorption was done at 165 °C under N<sub>2</sub> flow of 100 mL/min. The desorbed gaseous VFA mixture was then led over a fixed bed reactor containing the catalyst and heated to 400 °C. A liquid nitrogen cold trap was used to collect the products. The collected products, diluted in ethanol, were analyzed on a GC-FID (Bruker, 430-GC) equipped with a PoraPLOT Q-HT 25 x 0.32 analytical column and FID-detector, using 1,4-dioxane as an internal standard.

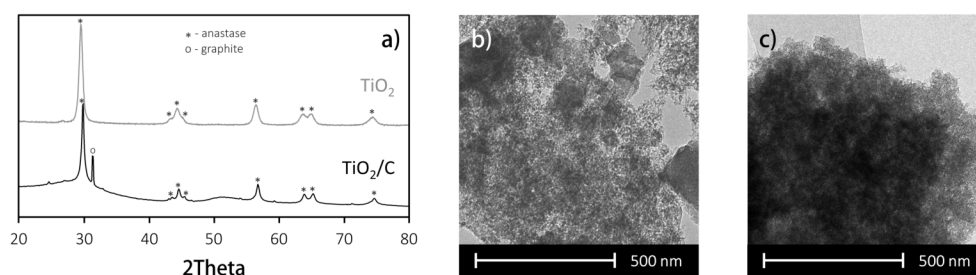

**Figure S2** a) XRD patterns of the synthesized catalysts. TEM images of b) activated carbon; c) TiO<sub>2</sub>/C.

**Table S2** BET surface area and pore volume of the TiO<sub>2</sub> catalysts and the carbon support.

| Catalyst            | BET surface area, m <sup>2</sup> /g | Pore volume, cm <sup>3</sup> /g |
|---------------------|-------------------------------------|---------------------------------|
| TiO <sub>2</sub>    | 80                                  | 0.21                            |
| Activated carbon    | 879                                 | 0.84                            |
| TiO <sub>2</sub> /C | 622                                 | 0.50                            |

**Table S3** Composition of the model solution representing fermented wastewater.<sup>2</sup>

| Concentration, wt.% |                |              |             | Concentration, mol/L |                                 |                                  | pH   |
|---------------------|----------------|--------------|-------------|----------------------|---------------------------------|----------------------------------|------|
| Acetic acid         | Propionic acid | Butyric acid | Lactic acid | KCl                  | Na <sub>2</sub> SO <sub>4</sub> | Na <sub>2</sub> HPO <sub>4</sub> |      |
| 0.25                | 0.25           | 0.25         | 0.25        | 0.05                 | 0.05                            | 0.1                              | 4.98 |

**Table S4** Composition of VFA mixture on the adsorbent after saturation.<sup>2</sup>

| g/kg of dry adsorbent |                |              |             |     |                                |                                |
|-----------------------|----------------|--------------|-------------|-----|--------------------------------|--------------------------------|
| Acetic acid           | Propionic acid | Butyric acid | Lactic acid | HCl | H <sub>2</sub> SO <sub>4</sub> | H <sub>3</sub> PO <sub>4</sub> |
| 1.5                   | 13.3           | 60.7         | 0           | 0   | 0                              | 0                              |

## References

1. Reyhanitash, E.; Zaalberg, B.; Kersten, S. R. A.; Schuur, B., Extraction of volatile fatty acids from fermented wastewater. *Sep. Purif. Technol.* **2016**, 161, 61–68. DOI: 10.1016/j.seppur.2016.01.037.
2. Reyhanitash, E., Separation of Waste-Derived VFA from Fermented Wastewater. Ph.D. Thesis, The University of Twente, February **2018**.
3. Tong, T.; Zhang, J.; Tian, B.; Chen, F.; He, D., Preparation of Fe<sup>3+</sup>-doped TiO<sub>2</sub> catalysts by controlled hydrolysis of titanium alkoxide and study on their photocatalytic activity for methyl orange degradation, *J. Hazard. Mater.* **2008**, 155, 572–579. DOI: 10.1016/j.jhazmat.2007.11.106.
4. Pham, T. N.; Shi, D.; Sooknoi, T.; Resasco, D. E., Aqueous-phase ketonization of acetic acid over Ru/TiO<sub>2</sub>/Carbon catalysts, *J. Catal.* **2012**, 295, 169–178. DOI: 10.1016/j.jcat.2012.08.012.
